# Supplementary material for: A bridge-like polymer synthesized by tandem metathesis cyclopolymerization and acyclic diene metathesis polymerization
Source: Royal Society of Chemistry journal article supplement (doi:10.1039/c4py01229a), 2014-10-28
Supplement: c4py01229a1.pdf [file c4py01229a1.pdf]

Supporting information for

Bridge-like polymer synthesized by tandem metathesis  
cyclopolymerization and acyclic diene metathesis polymerization

Wei Song, Huijing Han, Jianhua Wu and Meiran Xie\*

*Department of Chemistry, East China Normal University, Shanghai 200241, China*

*E-mail address: [mrxie@chem.ecnu.edu.cn](mailto:mrxie@chem.ecnu.edu.cn); Tel.: +86 21 54340058; Fax: +86 21 54340058*

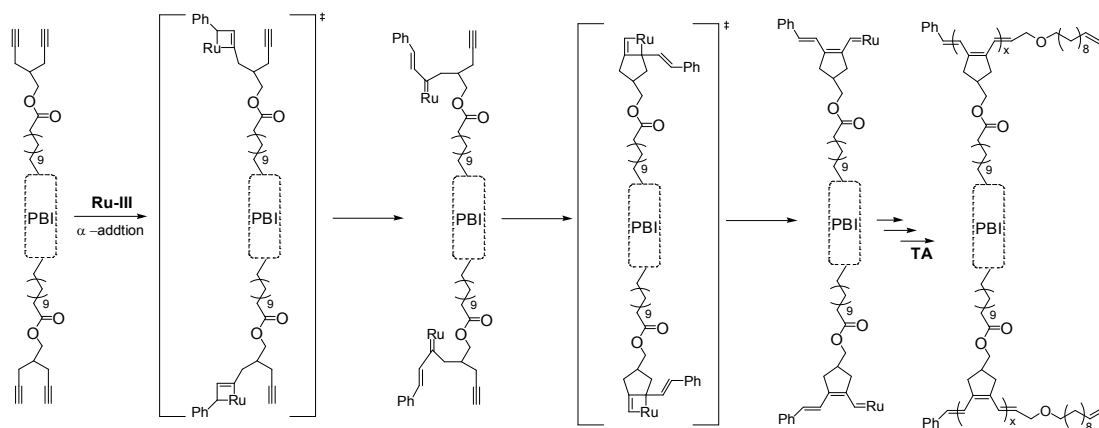

**Scheme S1** Reaction of monomer **1** with catalyst **Ru-III** and conformation of ladder-like poly(**1**).

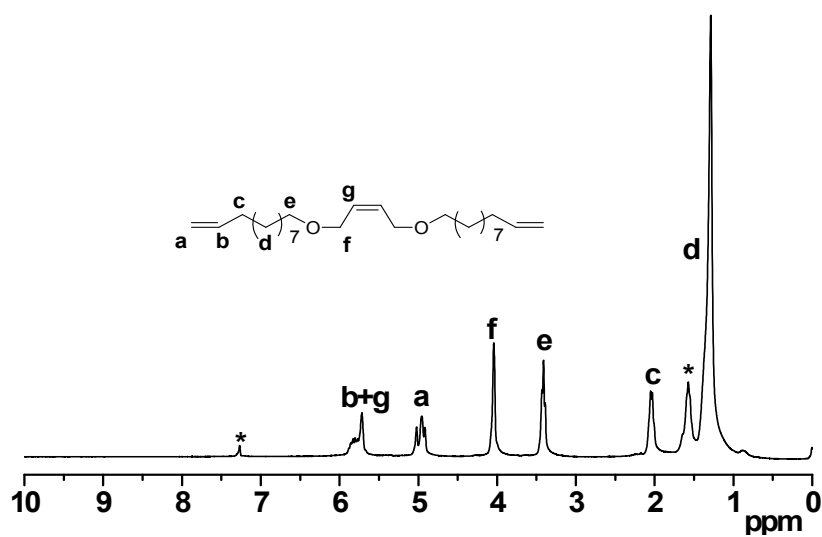

**Fig. S1**  $^1\text{H}$  NMR spectrum of TA (\*denote solvent).

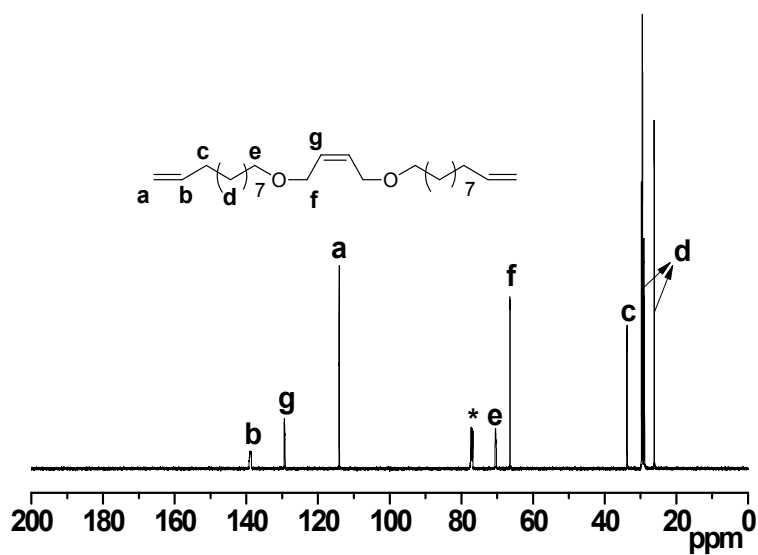

**Fig. S2**  $^{13}\text{C}$  NMR spectrum of TA (\*denote solvent).

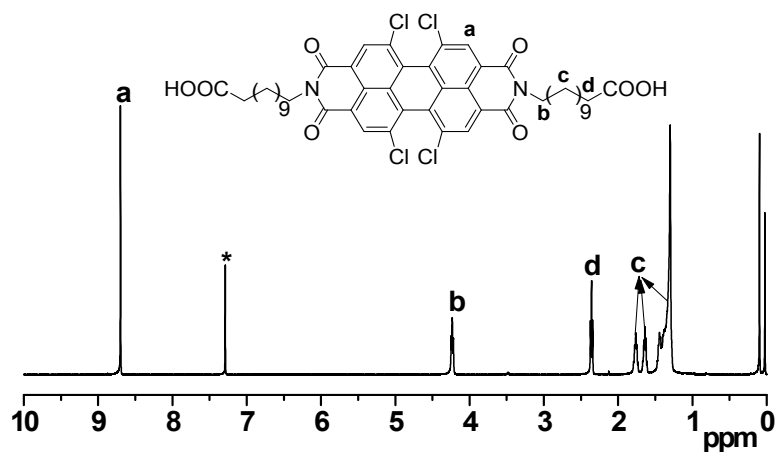

Fig. S3  $^1\text{H}$  NMR spectrum for PBI-COOH (\*denote solvent).

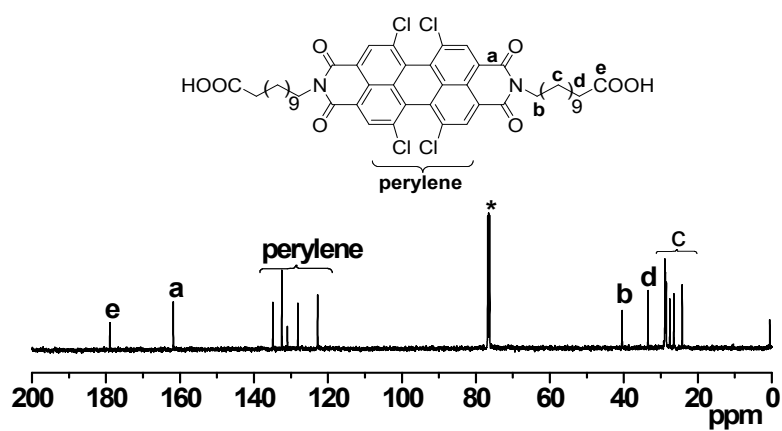

Fig. S4  $^{13}\text{C}$  NMR spectrum for PBI-COOH (\*denote solvent).

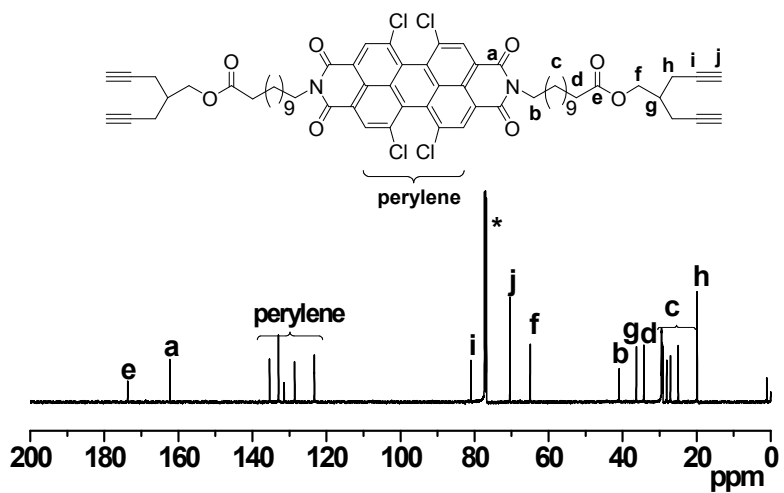

Fig. S5  $^{13}\text{C}$  NMR spectrum for monomer 1 (\*denote solvent).

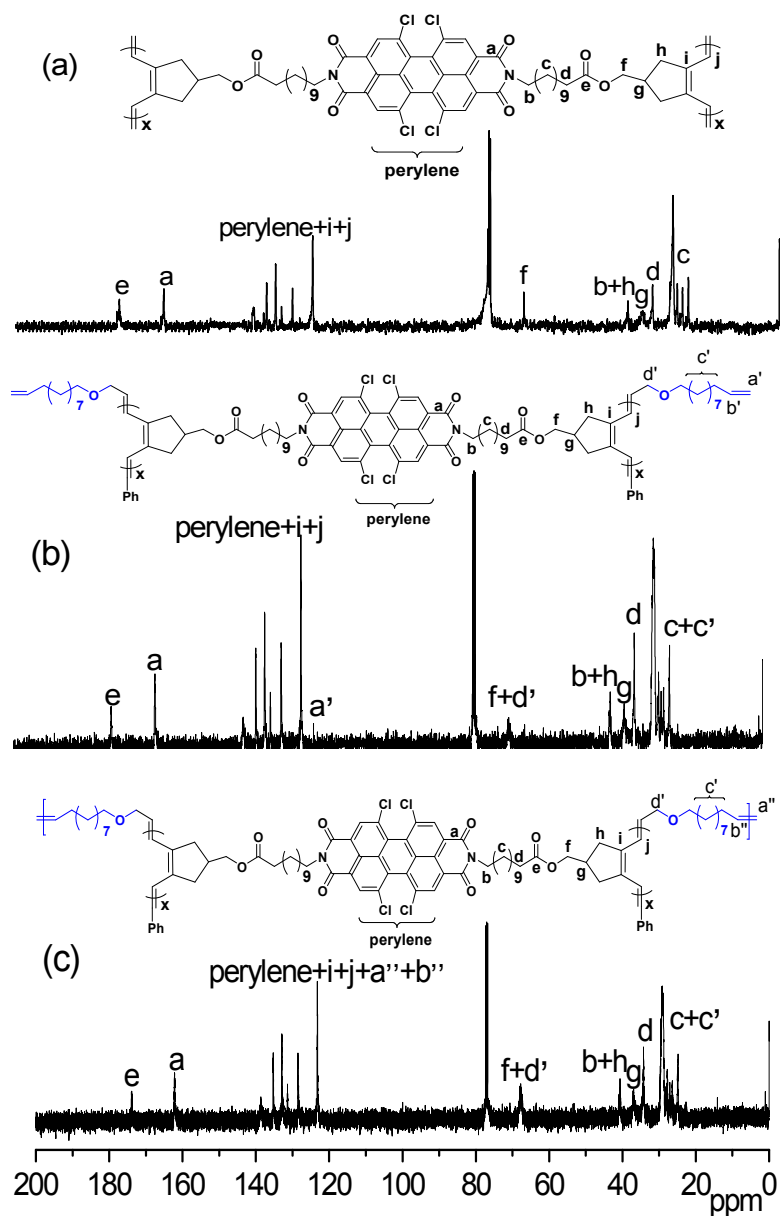

Fig. S6  $^{13}\text{C}$  NMR spectra of (a) poly(1)\*, (b) poly(1), and (c) poly(2).

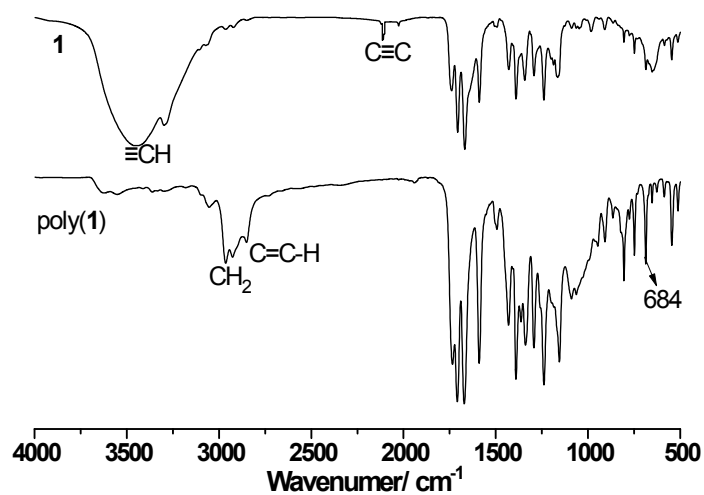

Fig. S7 IR spectra for 1 and poly(1).

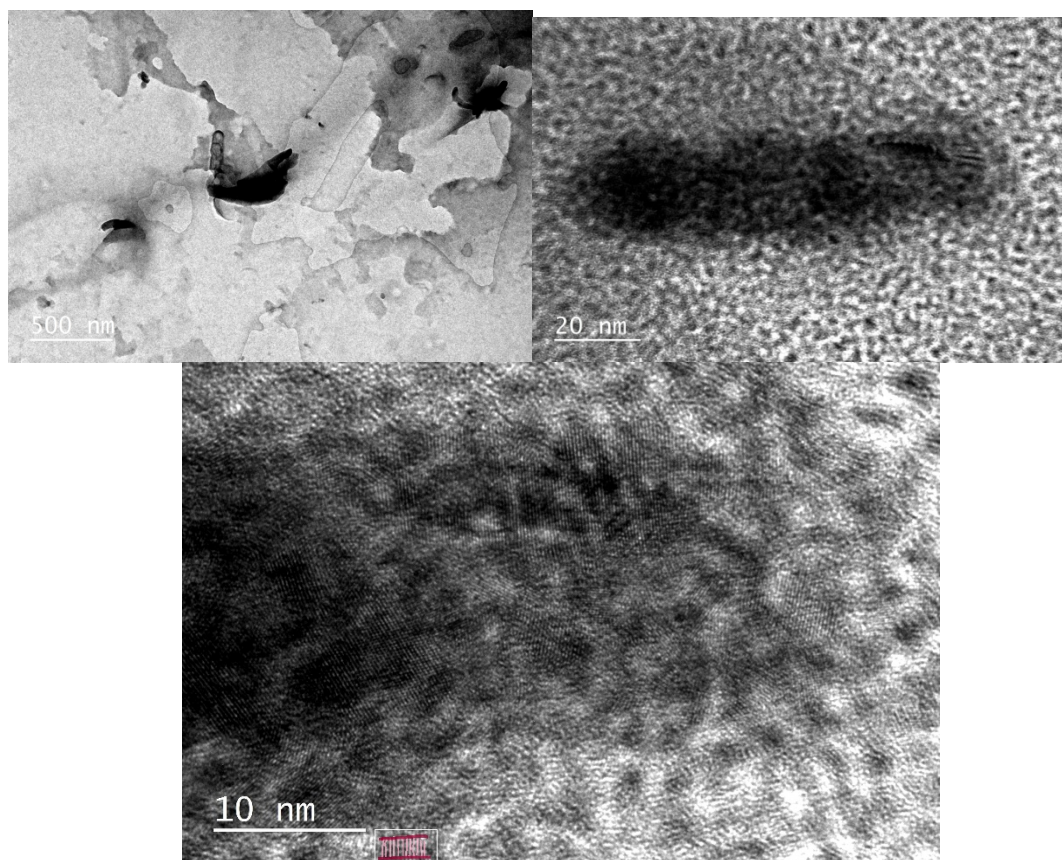

**Fig. S8** HR-TEM images of poly(1).

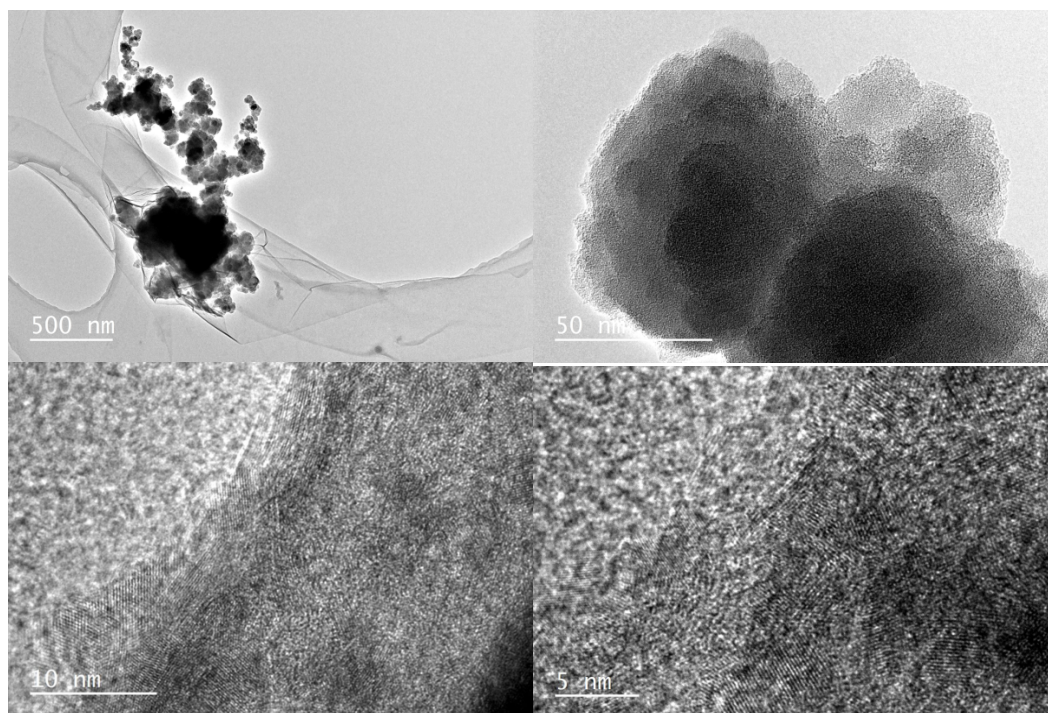

**Fig. S9** HR-TEM images of poly(2).
